# Supplementary material
Source: PubMed Central journal article supplement (PMC11115188)
Supplement: 18_2012_1030_MOESM3_ESM.pdf [file 18_2012_1030_MOESM3_ESM.pdf]

## Functional characterization of the human $\alpha$ -cardiac actin mutations Y166C and M305L involved in hypertrophic cardiomyopathy

Mirco Müller, Antonina Joanna Mazur, Elmar Behrmann, Ralph P. Diensthuber, Michael B. Radke, Zheng Qu, Christoph Littwitz, Stefan Raunser, Cora-Ann Schoenenberger, Dietmar J. Manstein, and Hans Georg Mannherz

Corresponding author: Dr. Hans Georg Mannherz; hans.g.mannherz@rub.de

### Online Resource 3: Native gel electrophoresis with actin binding proteins

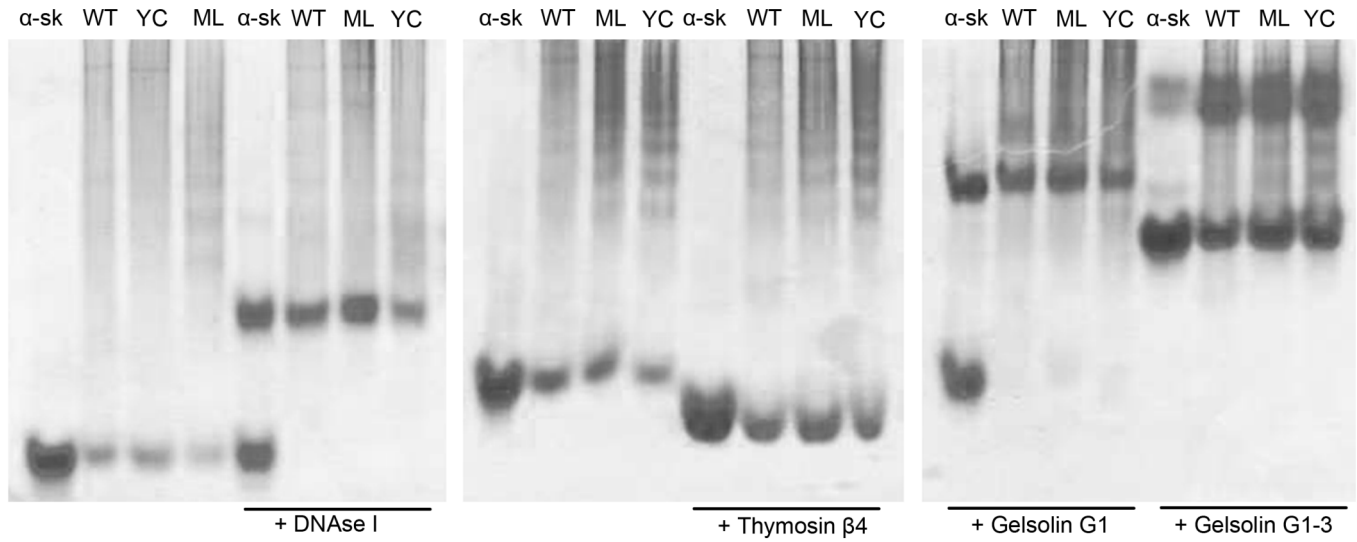

$\alpha$ -sk: rabbit  $\alpha$ -skeletal muscle actin, WT:  $\alpha$ -cardiac actin WT, ML:  $\alpha$ -cardiac actin M305L, YC:  $\alpha$ -cardiac actin Y166C
