# Supplementary material
Source: PubMed Central journal article supplement (PMC11115188)

## Functional characterization of the human $\alpha$ -cardiac actin mutations Y166C and M305L involved in hypertrophic cardiomyopathy

Mirco Müller, Antonina Joanna Mazur, Elmar Behrmann, Ralph P. Diensthuber, Michael B. Radke, Zheng Qu, Christoph Littwitz, Stefan Raunser, Cora-Ann Schoenenberger, Dietmar J. Manstein, and Hans Georg Mannherz

Corresponding author: Dr. Hans Georg Mannherz; hans.g.mannherz@rub.de

### Online Resource 4: Determination of the critical concentration

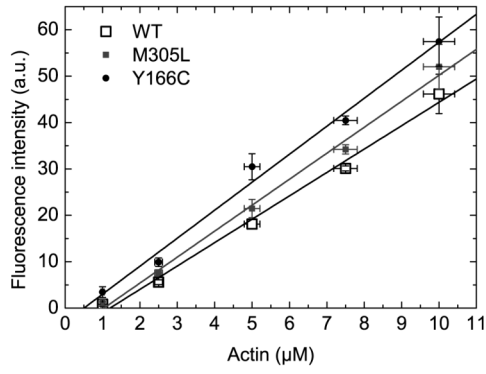

Supplement: 18_2012_1030_MOESM4_ESM.pdf [file 18_2012_1030_MOESM4_ESM.pdf]
